# Supplementary material for: Lithium storage mechanisms of CdSe nanoparticles with carbon modification for advanced lithium ion batteries
Source: Royal Society of Chemistry journal article supplement (doi:10.1039/c8cc09569h), 2019-01-01
Supplement: c8cc09569h1.pdf [file c8cc09569h1.pdf]

# **Lithium storage mechanisms of CdSe nanoparticles with carbon modification for advanced lithium ion batteries**

## **Experimental**

### **Synthesis**

Graphene oxide (GO) was prepared using the modified hummer's method [39]. The carbon nanotube (CNT) was functionalized with concentrated HNO<sub>3</sub> before synthesis. 40 mg GO or CNT was dispersed in 60 ml deionized water under ultrasonication for 0.5 h to form carbon suspension. 2 mmol Cd(NO<sub>3</sub>)<sub>2</sub>·4H<sub>2</sub>O and 4 mmol SeO<sub>2</sub> were added into this dispersion with constant stirring for 0.5 h. Then, 10 ml hydrazine hydrate (N<sub>2</sub>H<sub>4</sub>·H<sub>2</sub>O, 50 %) was added into this dispersion with constant stirring for another 0.5 h. The mixture was pulled in a 100 ml Teflon-lined stainless steel autoclave and heated at 180 °C for 24 h. After reaction, CdSe/reduced Graphene oxide and CdSe/Carbon nanotube composites were finally obtained after repeated washing with deionized water and drying at 60 °C overnight in a vacuum oven, which were named as CdSe@rGO and CdSe@CNT, respectively. CdSe nanoparticles were prepared under the same procedure without adding GO and CNT.

### **Characterization**

The phase of samples were characterized by powder X-ray diffraction (XRD) on a Rigaku X-ray diffractometer (Dmax-2200) with a scan rate of 4°/min. Raman spectra were recorded on Raman spectrometer (Thermo Fischer DXR). The carbon content in the CdSe@rGO and CdSe@CNT composites were determined using thermogravimetric analysis (TGA, STA449F3C) at a heating rate of 10 °C min<sup>-1</sup> under O<sub>2</sub> gas atmosphere. The morphologies and microstructure of samples were observed using field emission scanning electron microscopy (FESEM, SIGMA), transmission electron microscopy (TEM, JEOL-2000CX) and high-resolution TEM (HRTEM, JEOL-2010F). The chemical valences of atoms for samples were collected by X-ray photoelectron spectrometer (XPS, Thermo ESCALAB 250Xi).

### **Electrochemical measurement**

The working electrodes on copper foil consisted of 80 wt% active materials, 10 wt%

acetylene black and 10 wt% polyvinylidene. The typical loading mass of active material is  $\sim 2.1 \text{ mg cm}^{-2}$  and the thickness of electrode is  $\sim 150 \text{ }\mu\text{m}$ . The coin cells were assembled using lithium foil as the counter electrode and Celgard 2500 membrane as the separator. The electrolyte is 1 M  $\text{LiPF}_6$  solution in ethylene carbonate, dimethyl carbonate and ethyl-methyl carbonate with a volume ratio of 1:1:1. Galvanostatic charge and discharge tests were performed on a LAND CT2001A. Cycle voltammetry (CV) at various scan rates and electrochemical impedance spectroscopy (EIS) between 10 mHz and 100 kHz were carried out using the VSP electrochemical workstation (Biologic, FRA).

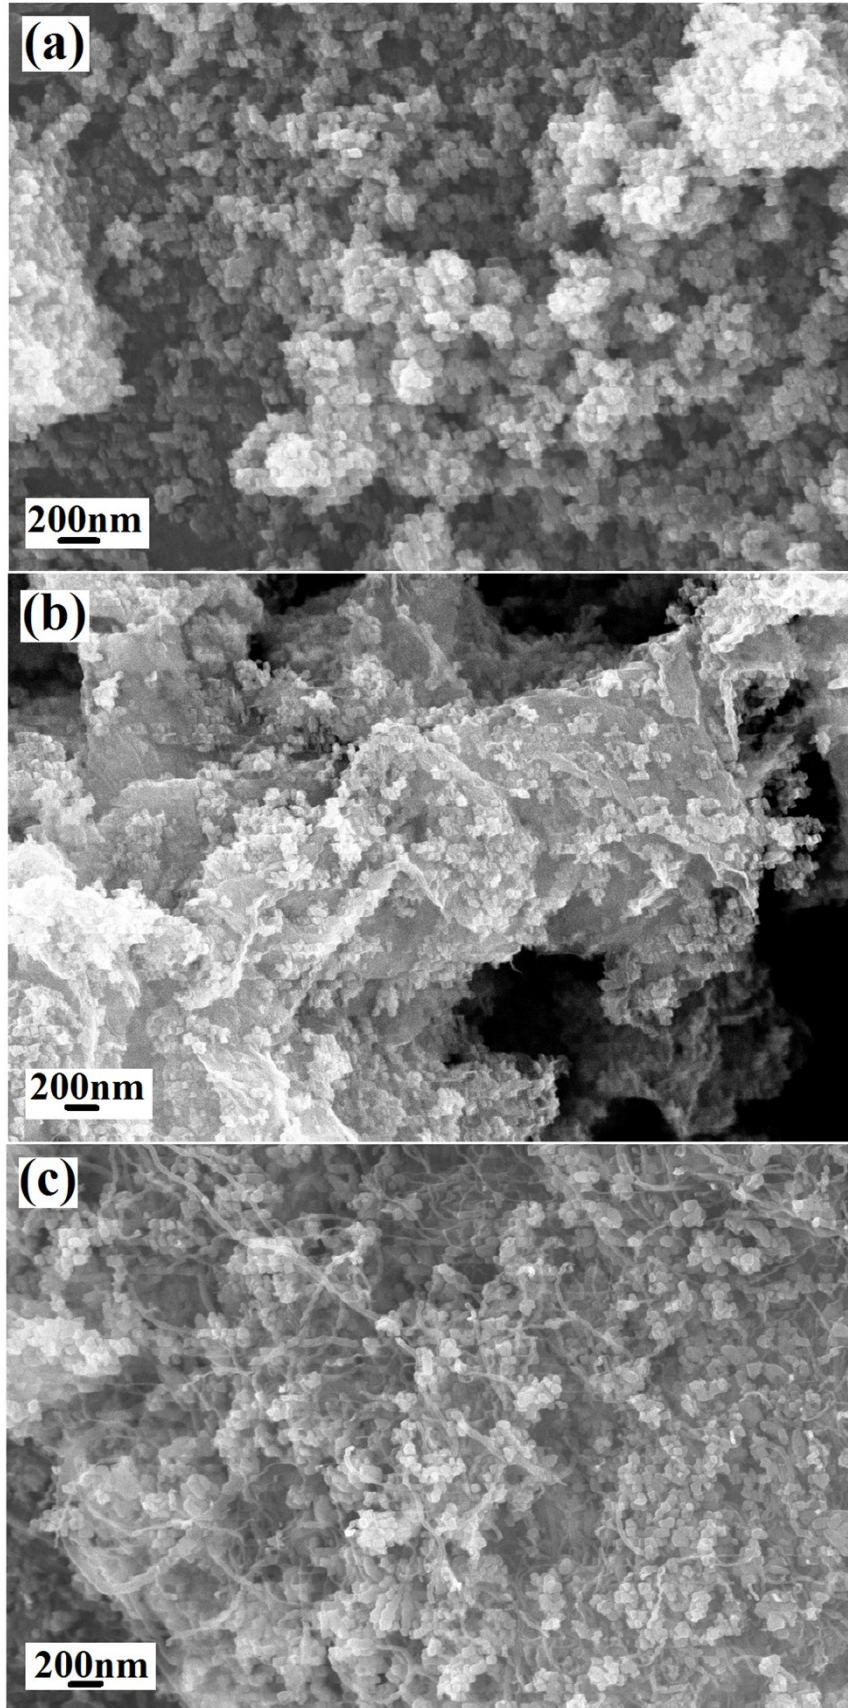

**Fig. S1. High magnification SEM images of (a) CdSe, (b) CdSe@rGO and (c) CdSe@CNT.**

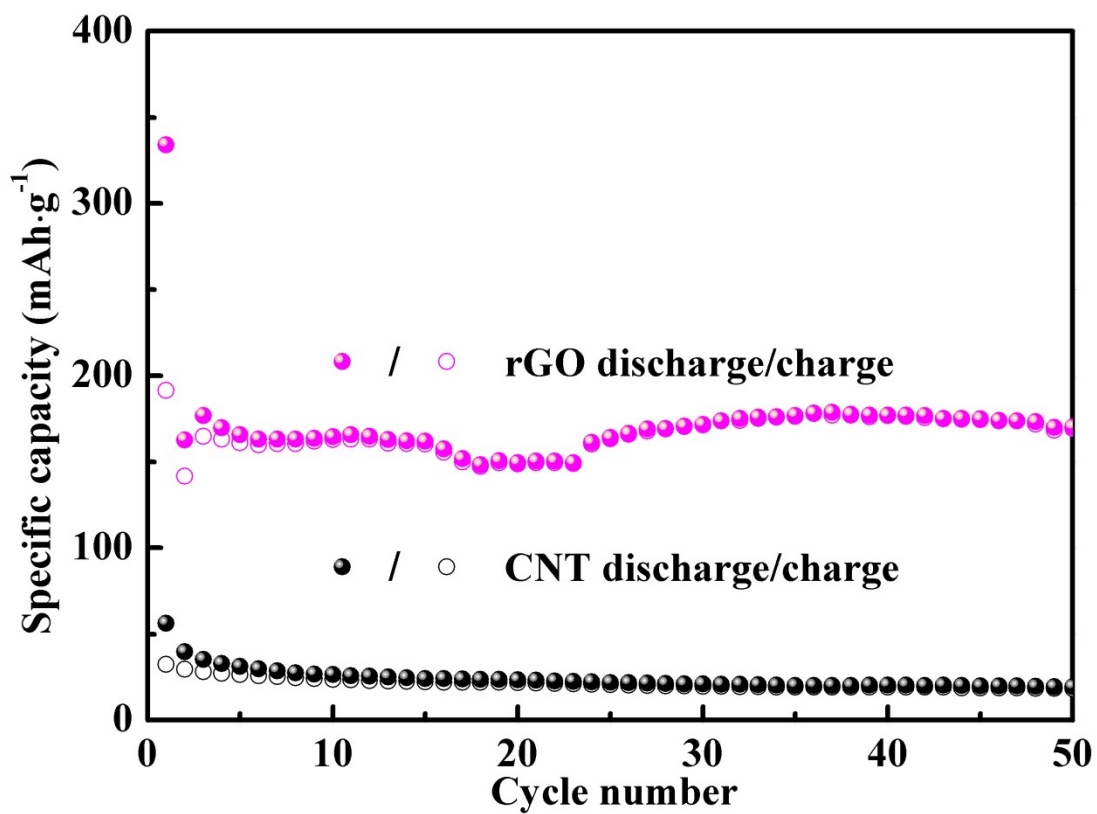

Fig. S2. Cycling performance of rGO and CNT at  $100 \text{ mA g}^{-1}$ .

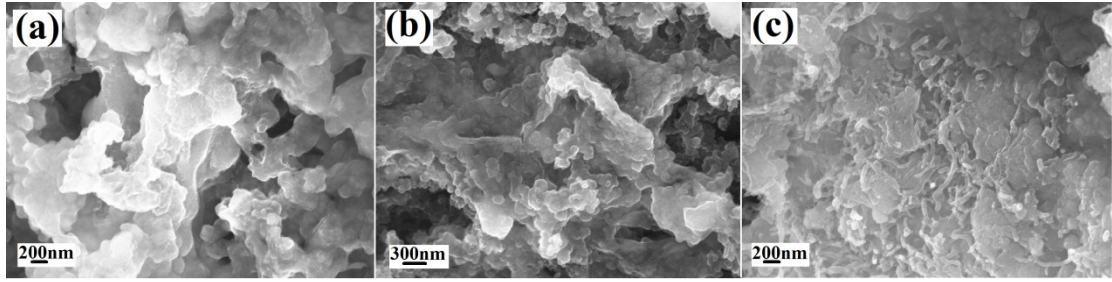

**Fig. S3. High magnification SEM images of (a) CdSe, (b) CdSe@rGO and (c) CdSe@CNT after 10 cycles.**

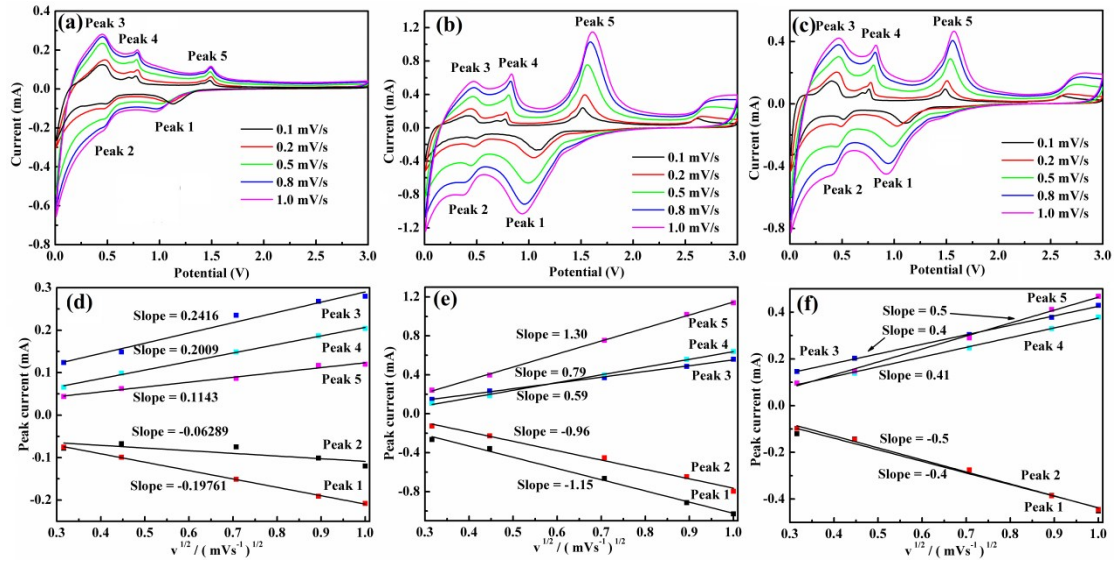

**Fig. S4.** CVs of CdSe (a), CdSe@rGO (b) and CdSe@CNT (c) electrodes at different scan rates; The peak current against the square root of scan rates for the CdSe (d), CdSe@rGO (e) and CdSe@CNT (f) electrodes.

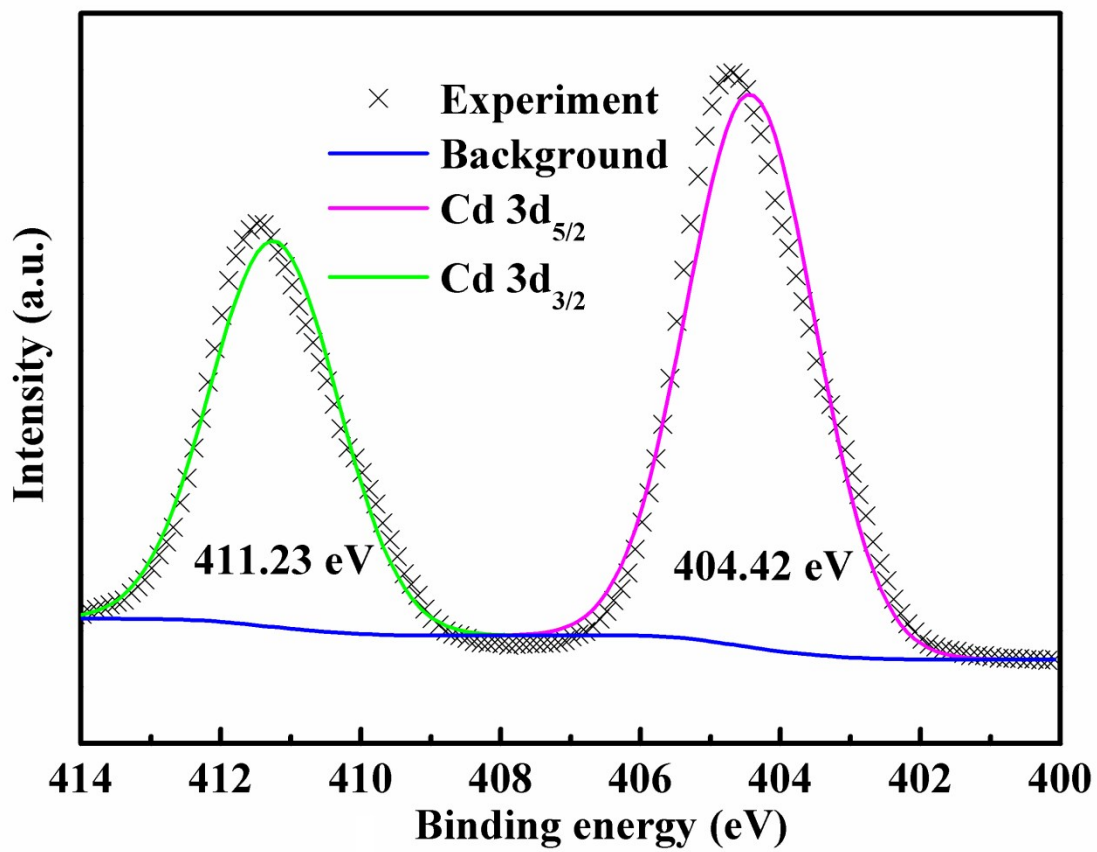

Fig. S5. XPS spectrum of Cd powder.

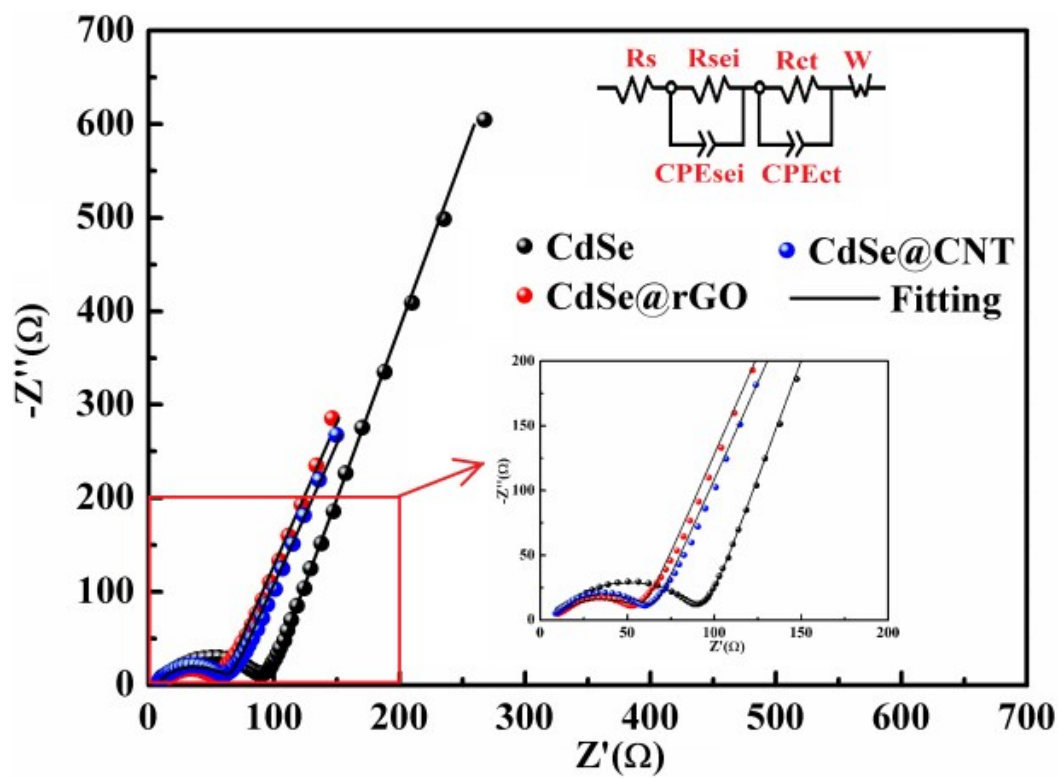

**Fig. S6.** Nyquist plots of the cells of the CdSe, CdSe@rGO and CdSe@CNT electrodes after 10 cycles.
